# Supplementary material
Source: PubMed Central journal article supplement (PMC3105644)
Supplement: 2010.035584_2.pdf [file 2010.035584_2.pdf]

**Manuscript no. HAEMATOL/2010/035584 entitled “CDKN1B encoding the cyclin-dependent kinase inhibitor 1B (p27) is located in the minimally deleted region of 12p abnormalities in myeloid malignancies and its low expression is a favorable prognostic marker in acute myeloid leukemia “**

**Authors: Claudia Haferlach, Ulrike Bacher, Alexander Kohlmann, Sonja Schindela, Tamara Alperman, Wolfgang Kern, Susanne Schnittger, Torsten Haferlach**

**Information about the contributions of each person named as having participated in the study**

**1) Guarantor(s), i.e., person(s) who is (are) responsible for the integrity of the work as a whole:**

- Claudia Haferlach
- Ulrike Bacher
- Alexander Kohlmann
- Sonja Schindela
- Tamara Alpermann
- Wolfgang Kern
- Susanne Schnittger
- Torsten Haferlach

According to the International Committee of Medical Journal Editors (ICMJE)

([http://www.icmje.org/ethical\\_1author.html](http://www.icmje.org/ethical_1author.html)): “*Authorship credit should be based on: 1) substantial contributions to conception and design, acquisition of data, or analysis and interpretation of data; 2) drafting the article or revising it critically for important intellectual content; and 3) final approval of the version to be published. Authors should meet conditions 1, 2, and 3 ..... Acquisition of funding, collection of data, or general supervision of the research group alone does not constitute authorship*”.

**The guarantors of this manuscript confirm that all persons designated as authors qualify for authorship, and that each author has participated sufficiently in the work to take public responsibility for appropriate portions of the content.**

**2) Authors who participated in the conception of the study:** Claudia Haferlach, Ulrike Bacher, Alexander Kohlmann, Sonja Schindela, Tamara Alpermann, Wolfgang Kern, Susanne Schnittger, Torsten Haferlach

**3) Design & Methods.** The following authors were responsible for specific investigations :

- Claudia Haferlach
- Ulrike Bacher
- Alexander Kohlmann
- Sonja Schindela
- Tamara Alpermann
- Wolfgang Kern
- Susanne Schnittger
- Torsten Haferlach

**4) Results.** The following authors were responsible for specific portions of the results, including figures and tables :

- Claudia Haferlach
- Ulrike Bacher
- Alexander Kohlmann
- Sonja Schindela
- Tamara Alpermann
- Wolfgang Kern

- Susanne Schnittger
- Torsten Haferlach

5) **Writing the manuscript.** The following authors were responsible for writing the manuscript:

- Claudia Haferlach
- Ulrike Bacher
- Alexander Kohlmann
- Sonja Schindela
- Tamara Alpermann
- Wolfgang Kern
- Susanne Schnittger
- Torsten Haferlach

6) **Contributors Listed in Acknowledgments:**

n.a.
